# Supplementary material for: Tumor immune microenvironment of self-identified African American and non-African American triple negative breast cancer
Source: PubMed Central journal article supplement (PMC9307813; doi:10.1038/s41523-022-00449-3), 2022-07-22
Supplement: 41523_2022_449_MOESM1_ESM.pdf [file 41523_2022_449_MOESM1_ESM.pdf]

## Supplementary Figures

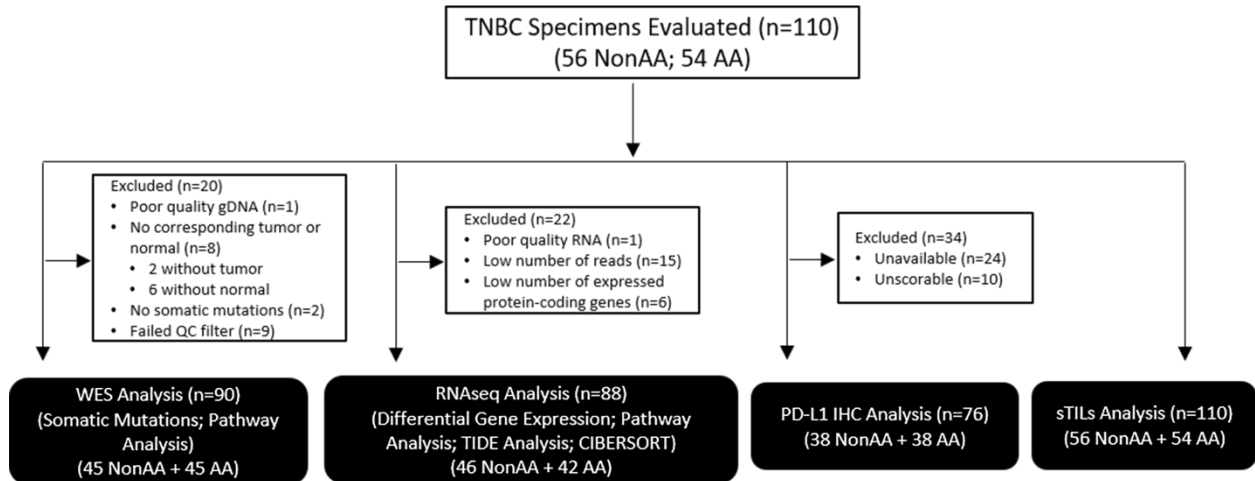

**Supplementary Figure 1. Consort diagram of samples for comparison of the FFPE tumor microenvironment of TNBC Non-African Americans (NonAA) and African American (AA) patients.**

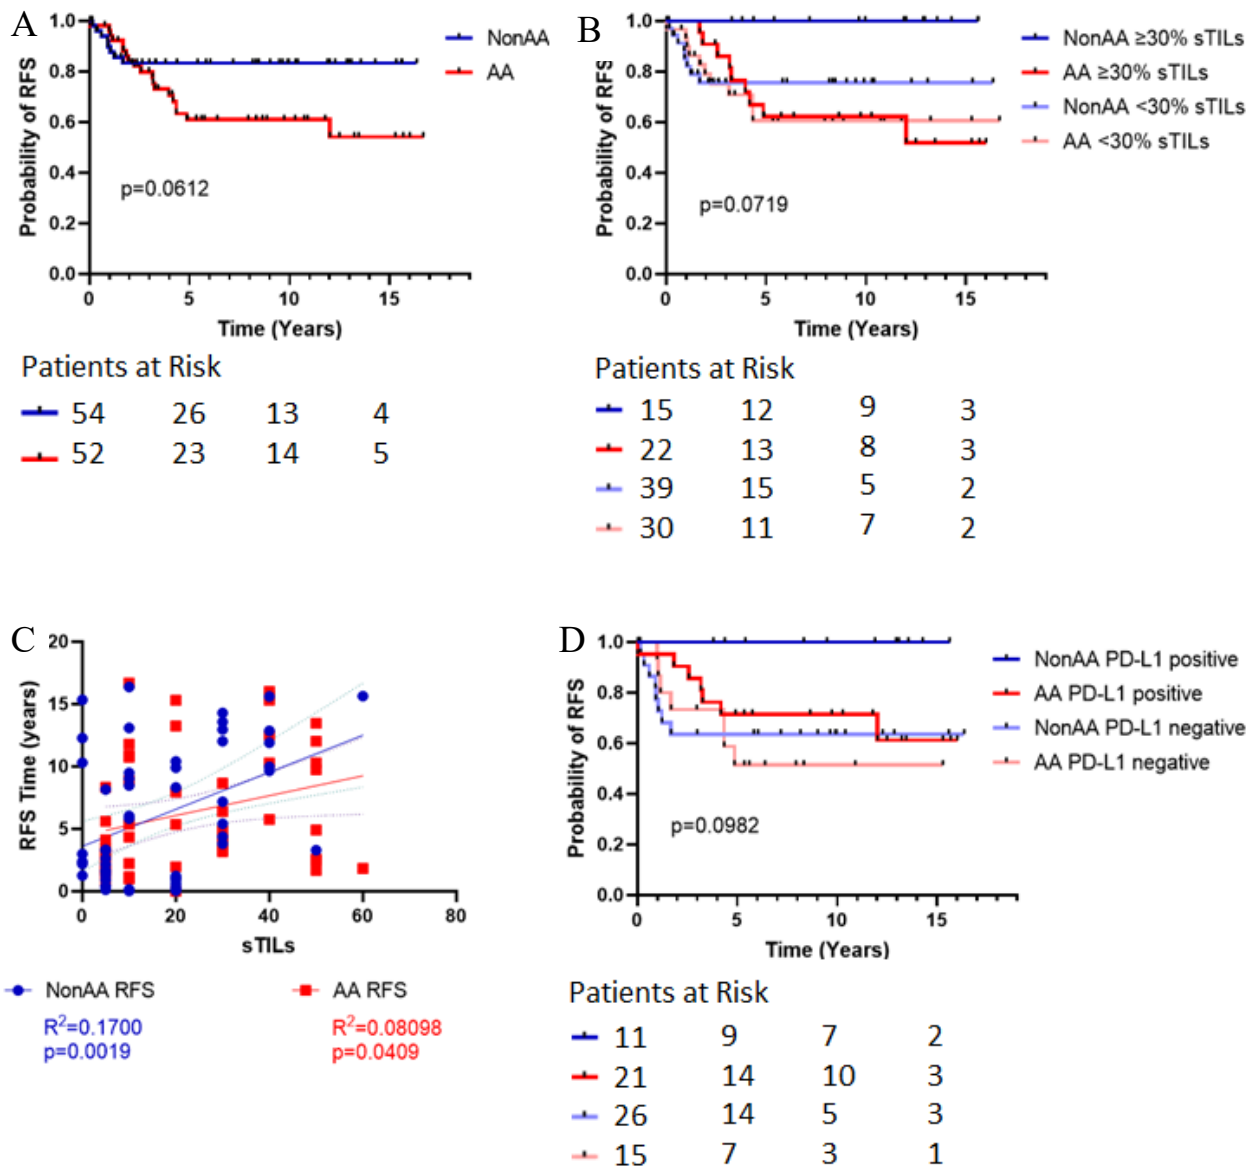

**Supplementary Figure 2. Recurrence Free Survival in age and pathology matched TNBC**

**in Non-African American (NonAA) and African American (AA) patients. (A)**

Recurrence Free Survival (RFS). (B) RFS stratified by sTILs scores dichotomized by

$\geq 30\%$  versus  $< 30\%$  (Park, et. al 2019 Ann Oncol<sup>1</sup>). (C) Correlation between sTILs and

RFS. (D) RFS stratified by SP142 PD-L1 positivity (yes vs no). P-values from Mantel-

Cox Test (A, B, D) or Linear Regression (C).

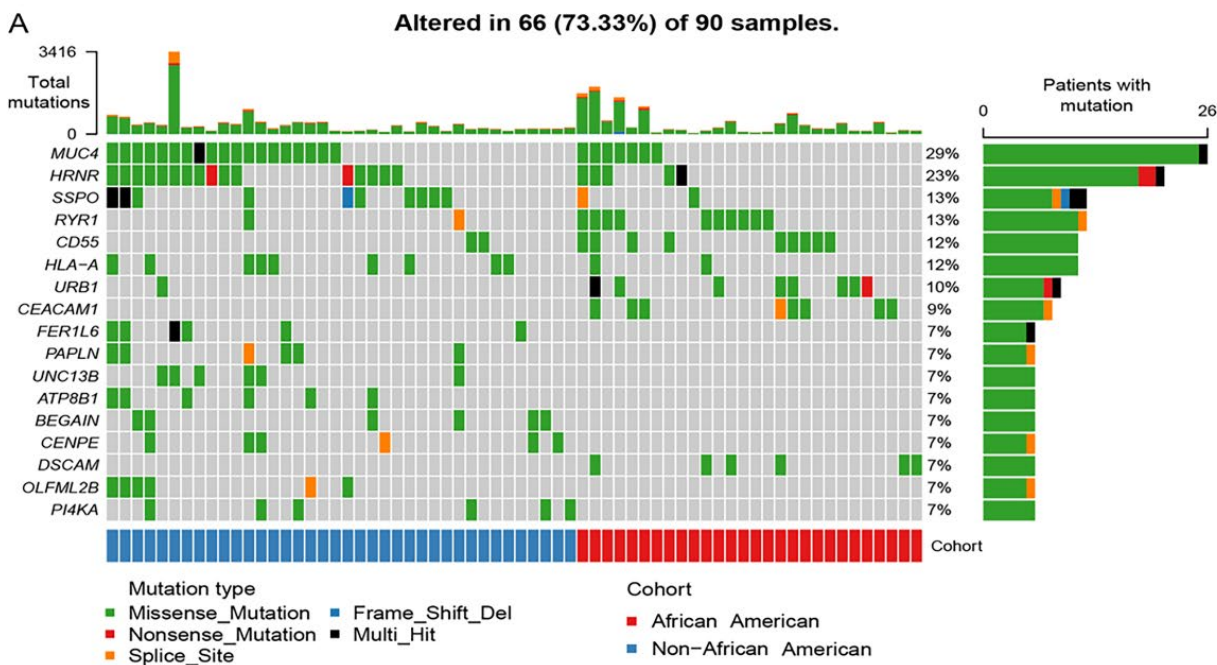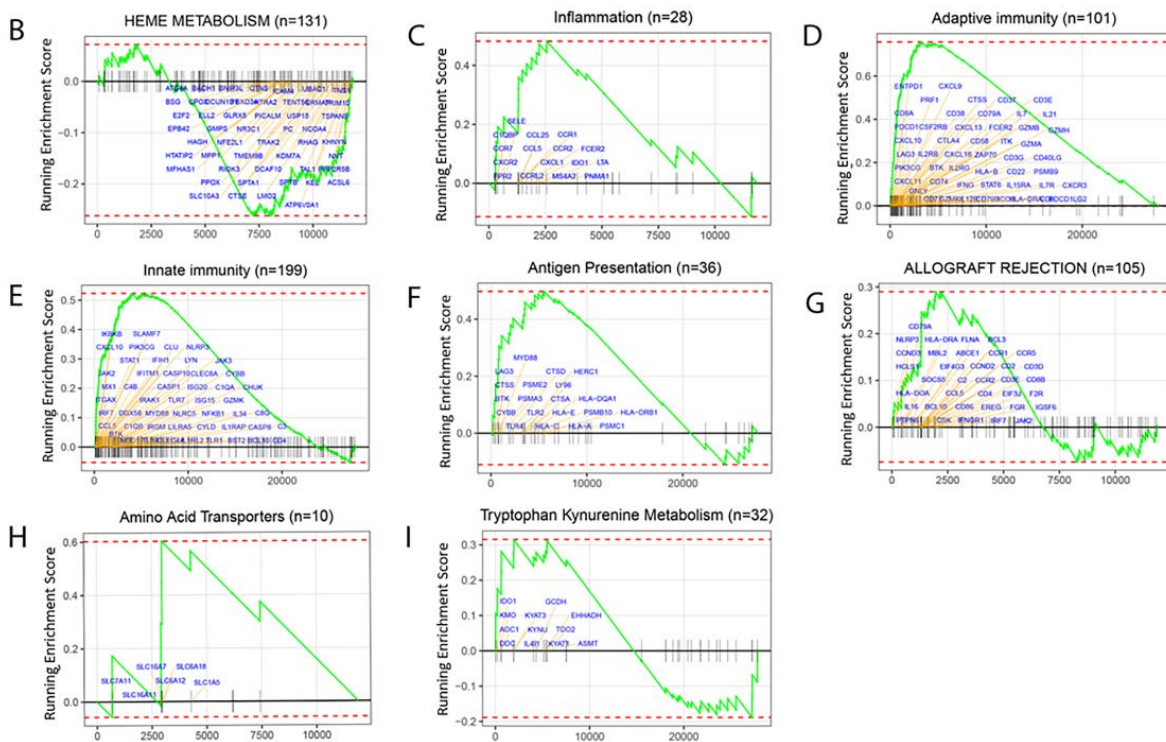

**Supplementary Figure 3. Somatic mutations in Non-African American (NonAA) and African American (AA) TNBC patients. (A) Distribution of somatic mutations in 17**

differentially mutated genes. (B-I) Leading edge genes that drive the significance of the findings in the 8 pathways from Figure 1 that were differentially affected by mutations in NonAA patients (B) and AA patients (C-I).

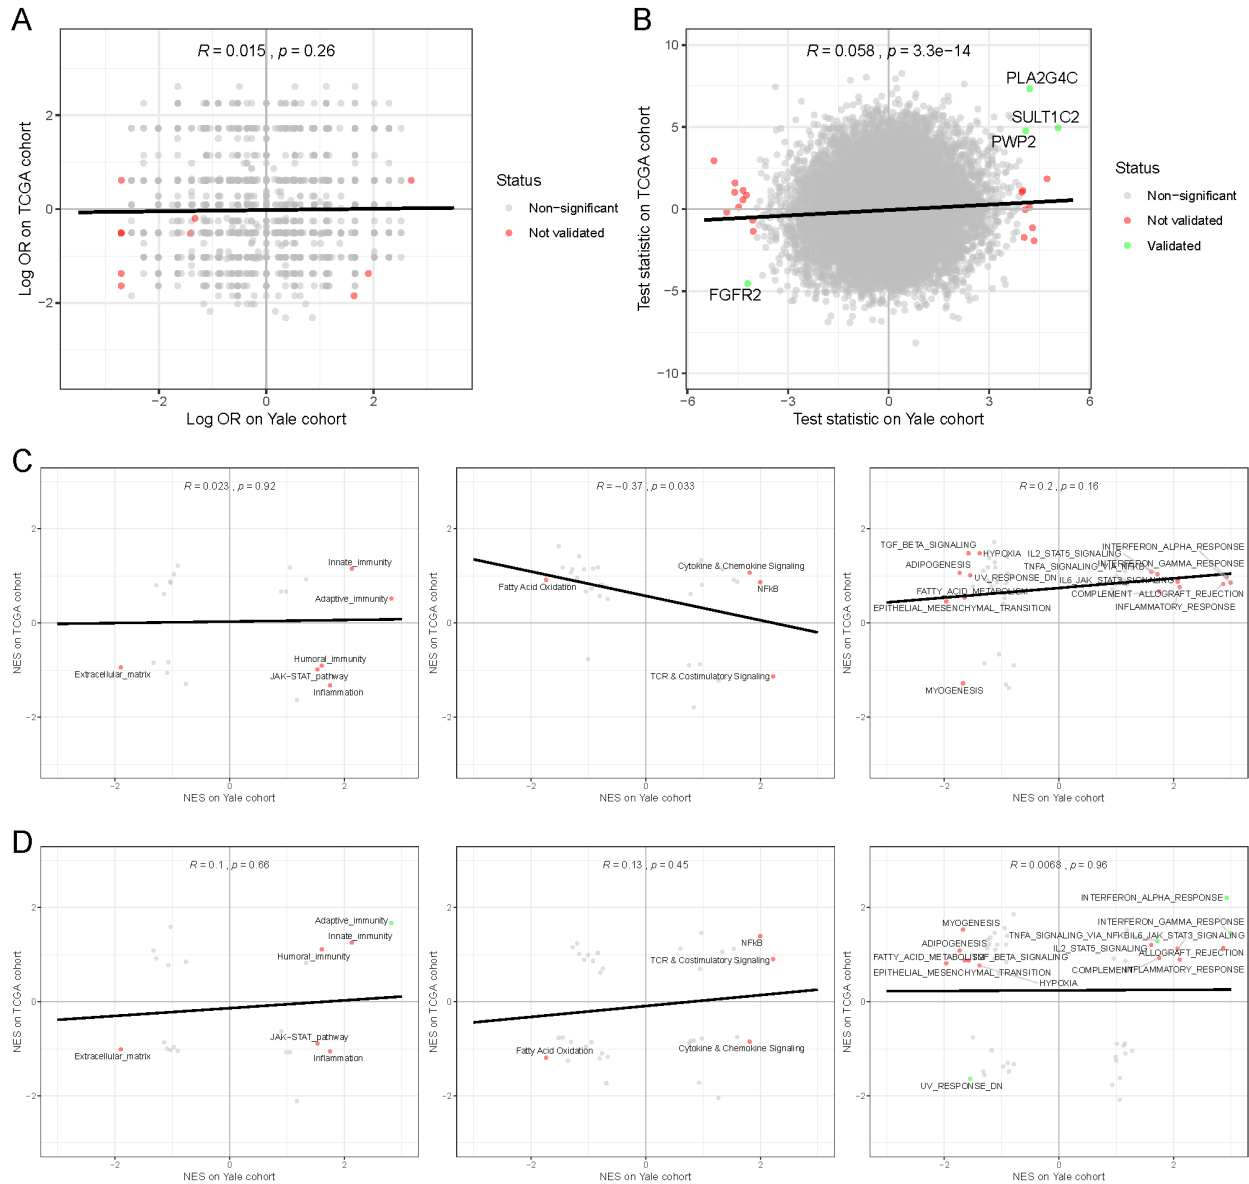

**Supplementary Figure 4. Validation of somatic mutations, differentially expressed genes, and gene sets using TCGA for comparison in Non-African American (NonAA) and African American (AA) patients.**

**African American (AA) TNBC patients.** Correlation between Yale and TCGA cohorts for (A) Somatic mutations from whole exome sequencing, (B) Differentially expressed genes, and (C-D) Cancer Hallmark, Metabolic, and MSigDB hallmark gene sets, respectively from WES (C) and RNA sequencing (D) analysis. OR = odds ratio. NES = Normalized Enrichment Score.

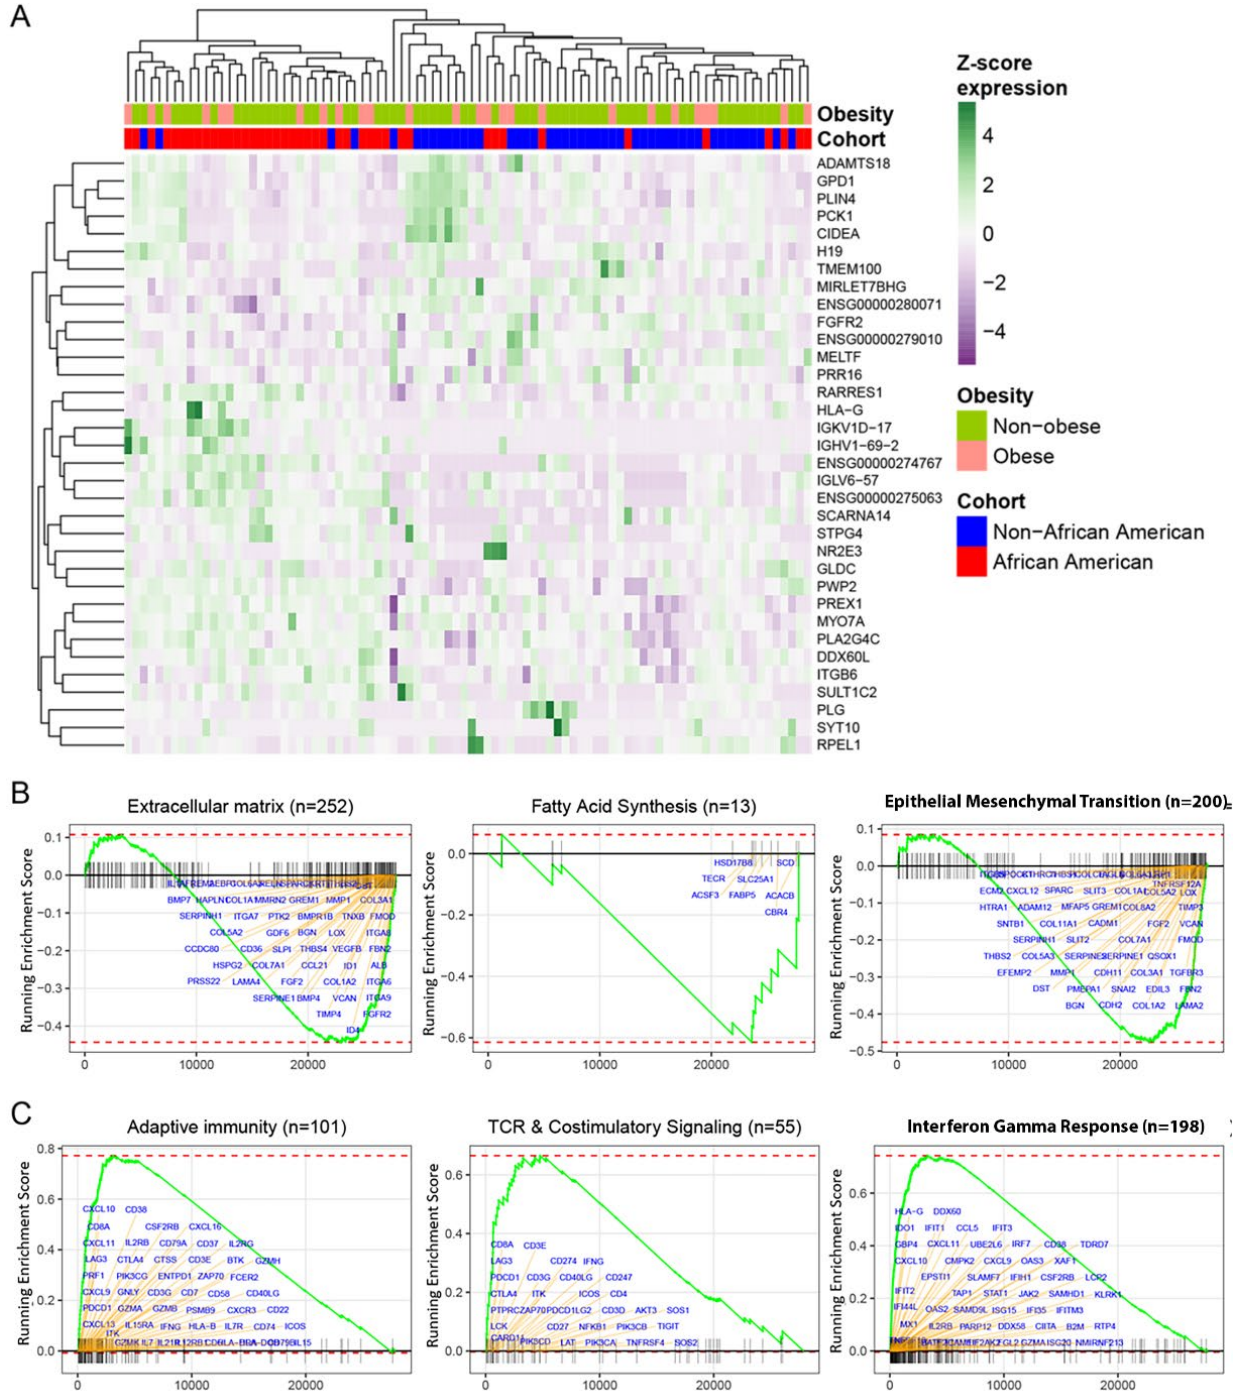

**Supplemental Figure 5. Heat map and leading-edge gene plots from pathway enrichment analysis of differentially expressed genes in Non-African American (NonAA) and African American (AA) TNBC patients. (A) Heatmap of all significantly differentially**

expressed genes. (B-C) Leading edge fraction genes for the top significantly enriched pathways in NonAA patients (B) and AA patients (C).

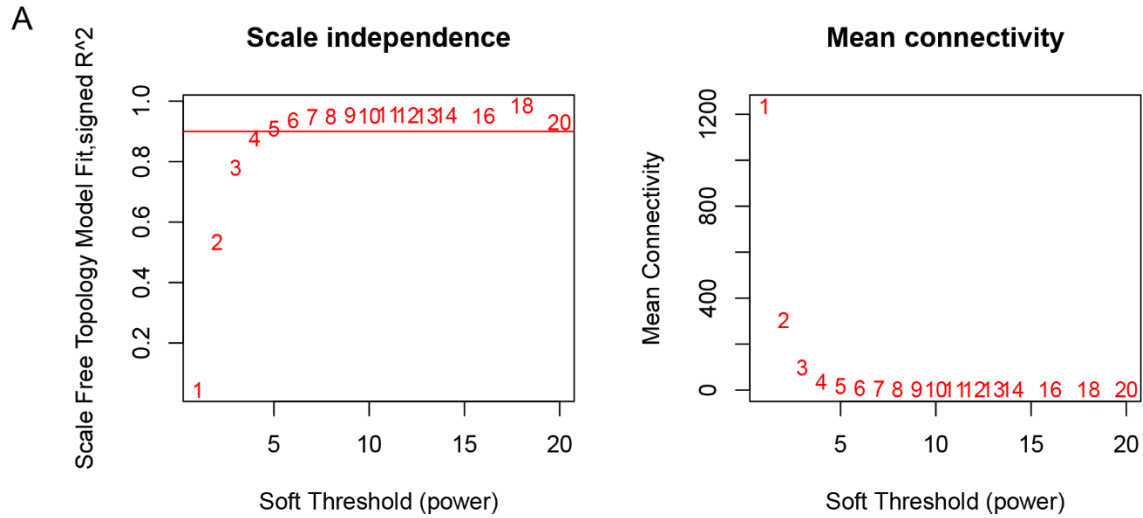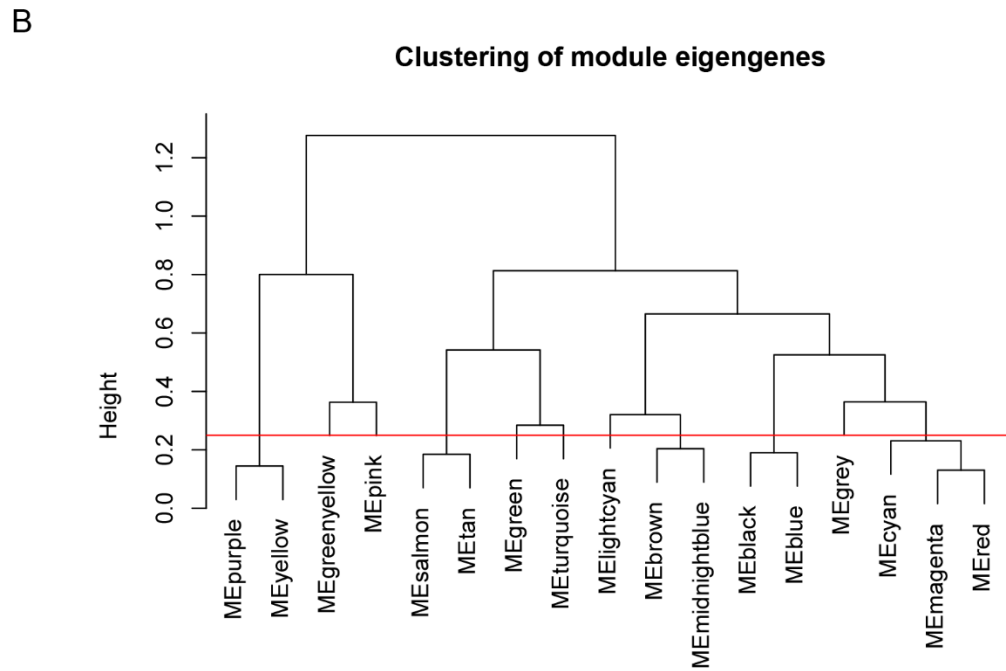

**Supplementary Figure 6. Processes for determining module selection and topology in Non-African American (NonAA) and African American (AA) TNBC patients. (A) Scale Free Topology Fitting Index (determines robustness of analysis) and biological signals**

(determines intramodular connectivity and prognostic significance) for finding soft threshold (power). (B) Clustering of module eigengenes to merge similar modules.

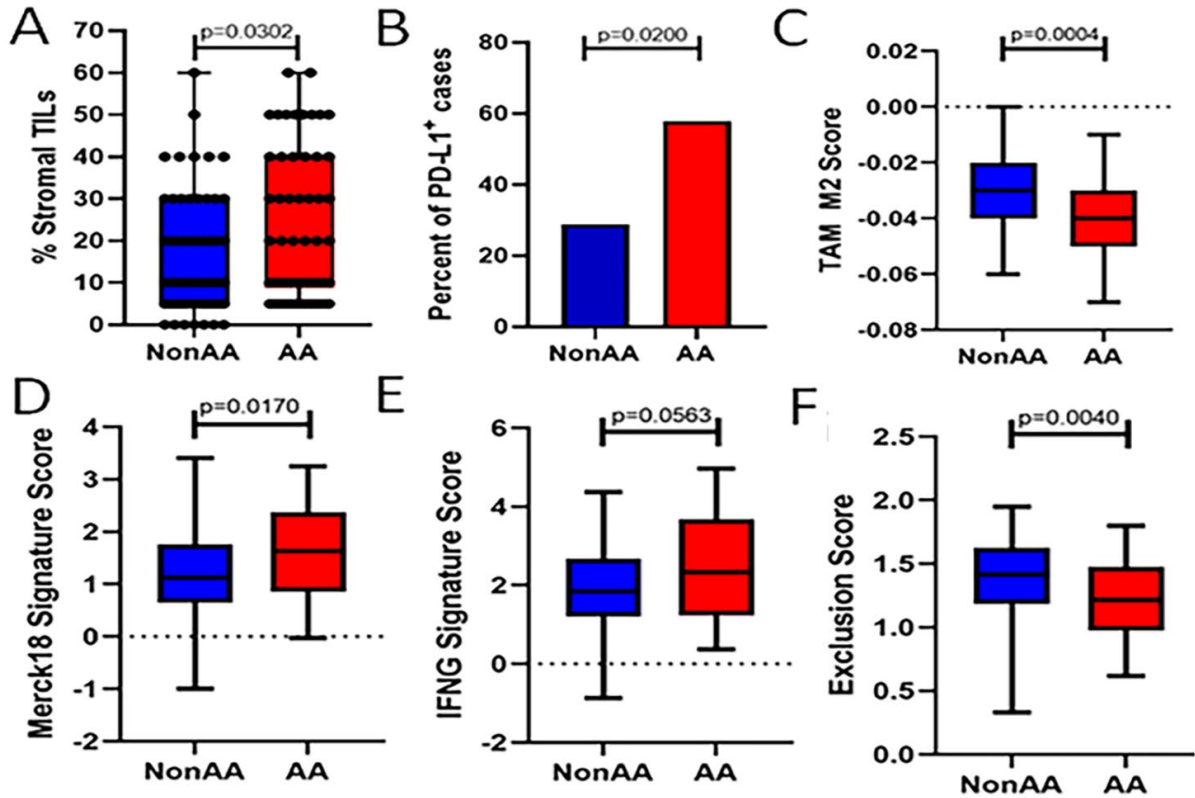

**Supplementary Figure 7. Significantly different immune variables in TNBC in Non-African American (NonAA) and African American (AA) patients including stromal tumor infiltrating lymphocytes (sTILs), PD-L1 immunohistochemistry, and immune gene expression scores from Tumor Immune Dysfunction and Exclusion (TIDE) analysis. (A) TIL percent. (B) PD-L1 positivity rates by SP142 immunohistochemistry. (C) Tumor-associated macrophage M2 (TAM M2), (D) Immune inflamed (Merck18), (E) interferon gamma (IFNG), and (F) T cell Exclusion scores. Nominal p-values unadjusted for multiple comparisons are shown. P-values from Mann-Whitney Test.**



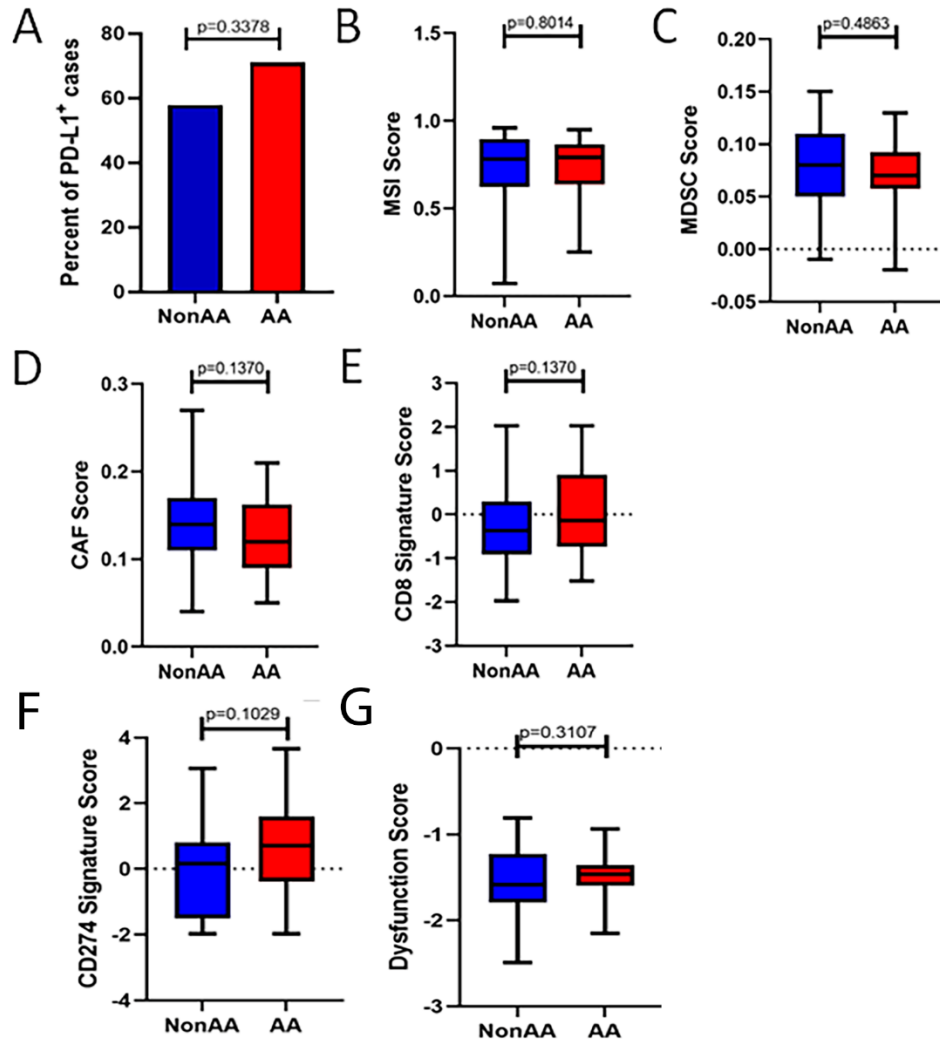

**Supplementary Figure 8. Immune parameters not significantly different between Non-African American (NonAA) and African American (AA) TNBC patients.** (A) PD-L1 SP263 immunohistochemistry analyzed as a contingency table using the Fisher's Exact Test. Immune scores from Tumor Immune Dysfunction and Exclusion (TIDE) analysis: (B) Microsatellite instability (MSI), (C) Myeloid-derived suppressor cells (MDSC), (D) Cancer-associated fibroblasts (CAF), (E) CD8 expression, (F) PD-L1 (CD274) expression scores, and (G) Immune Dysfunction. P-values from Mann-Whitney Test.

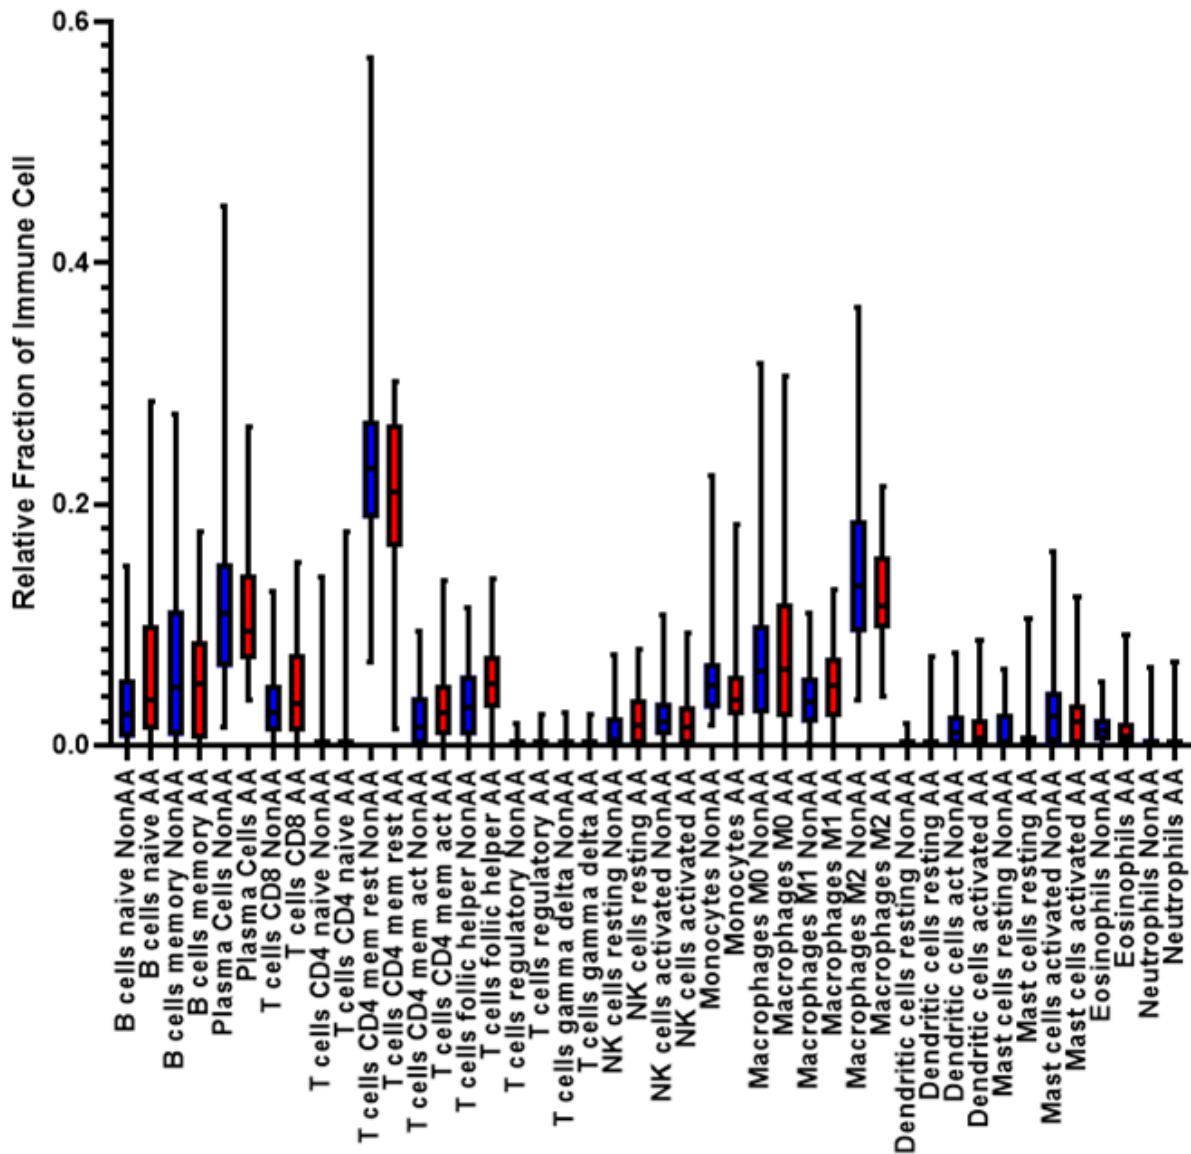

Supplementary Figure 9. CIBERSORTx cell type abundancies in TNBC in Non-African American (NonAA) and African American (AA) patients. Blue = NonAA. Red = AA.

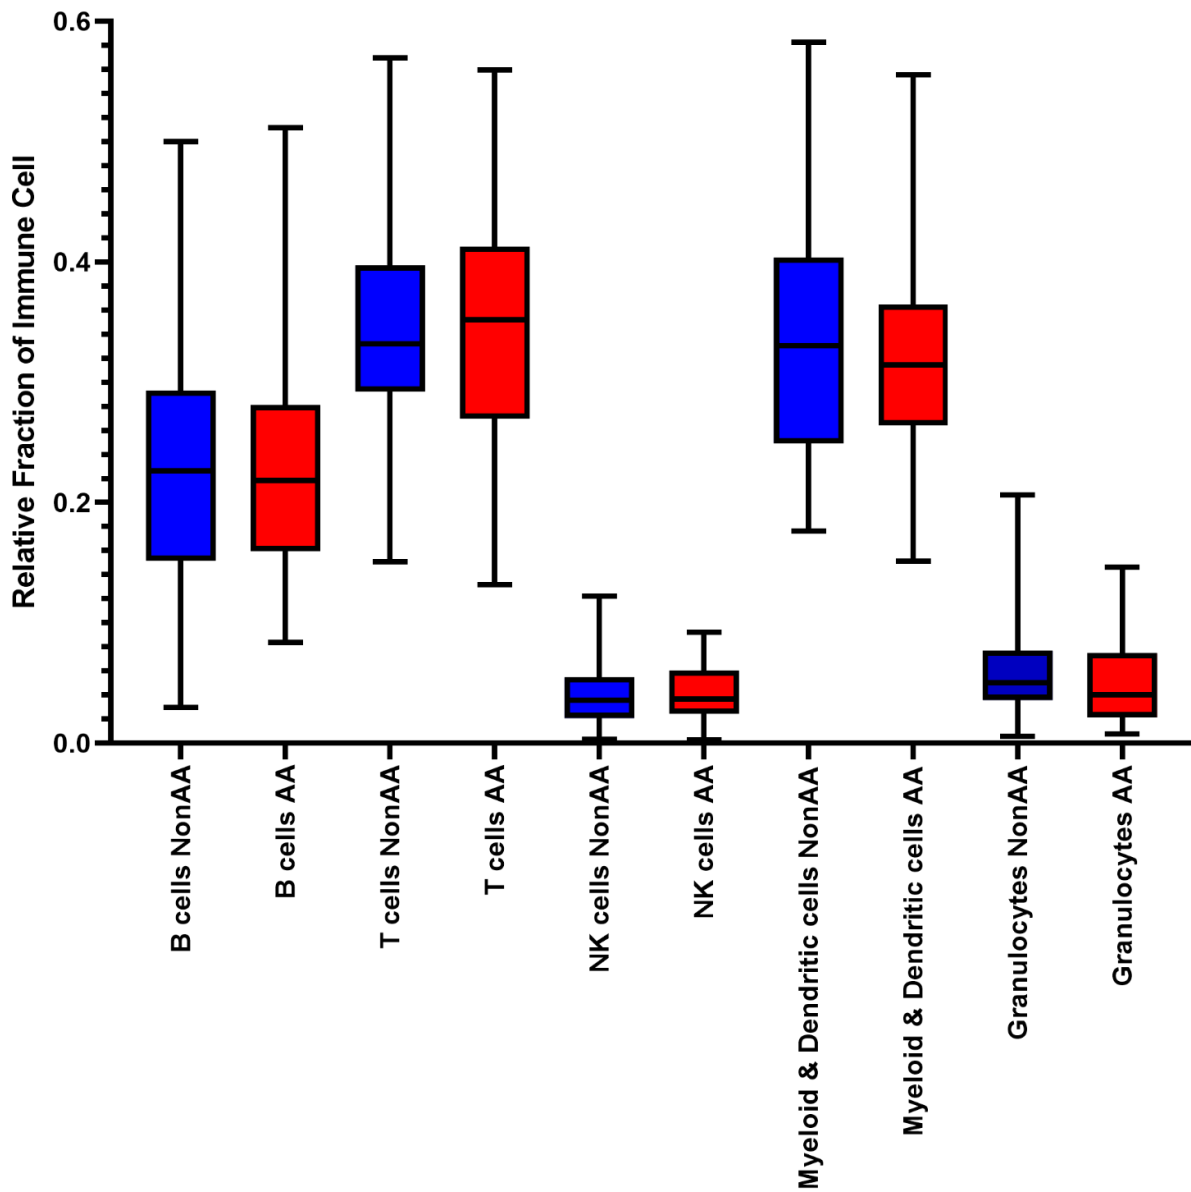

**Supplementary Figure 10. CIBERSORTx Groups in TNBC Non-African American**

**(NonAA) and African American (AA) patients.** Blue = NonAA. Red = AA. P-values from Kruskal–Wallis Test.

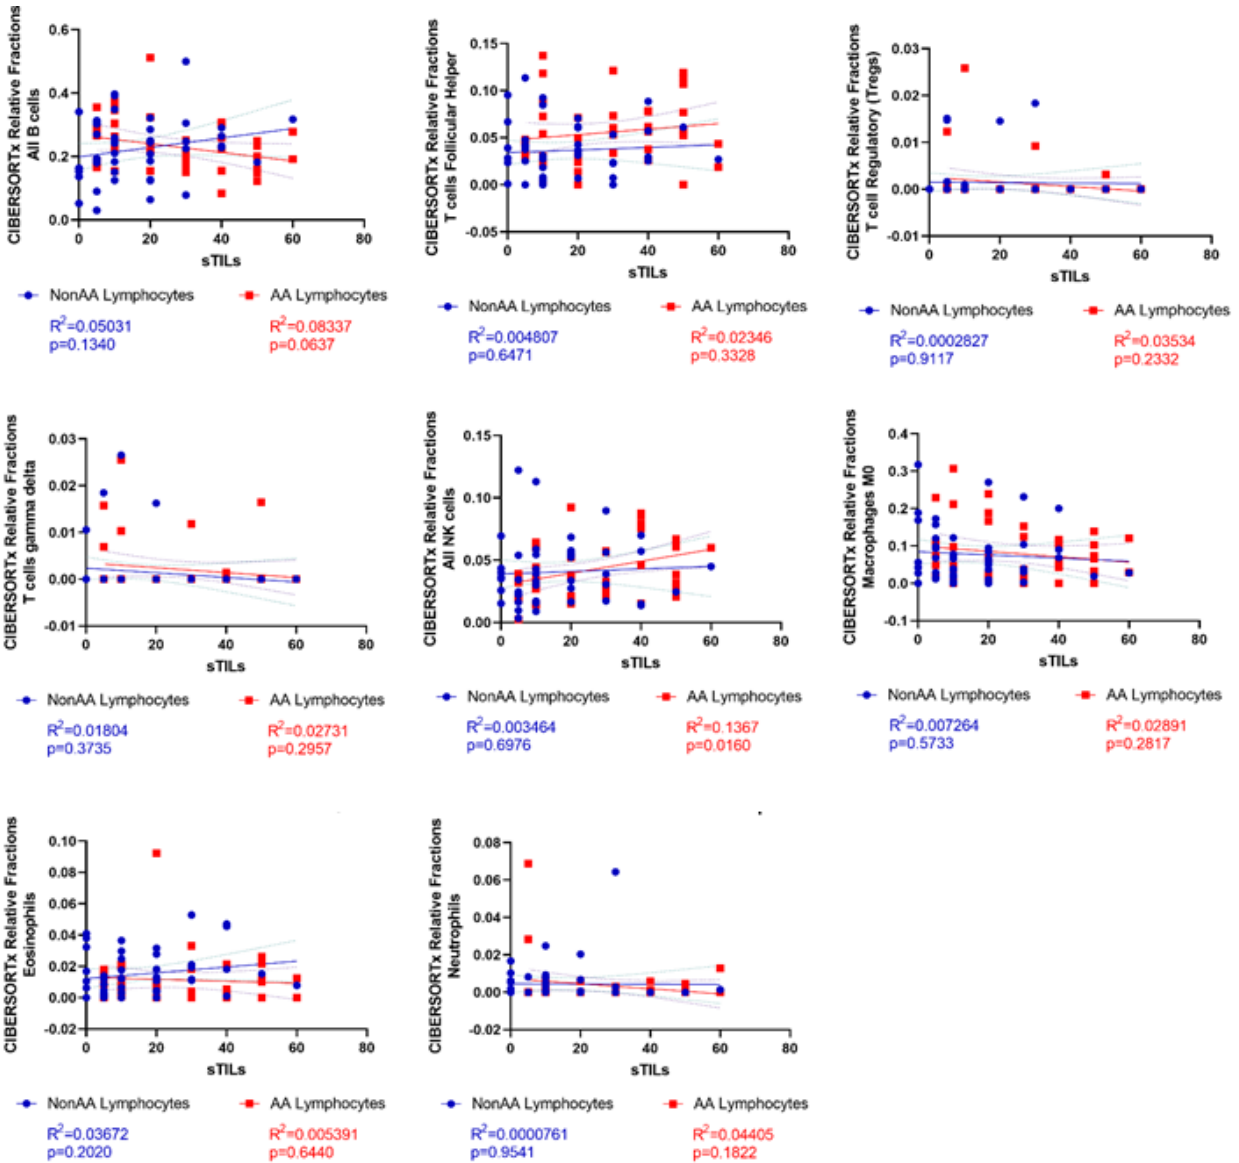

**Supplementary Figure 11. Correlations between histological stromal TILs and deconvoluted CIBERSORTx immune cell fractions in TNBC in Non-African American (NonAA) and African American (AA) patients. Blue = NonAA. Red = AA. P-values from Linear Regression.**

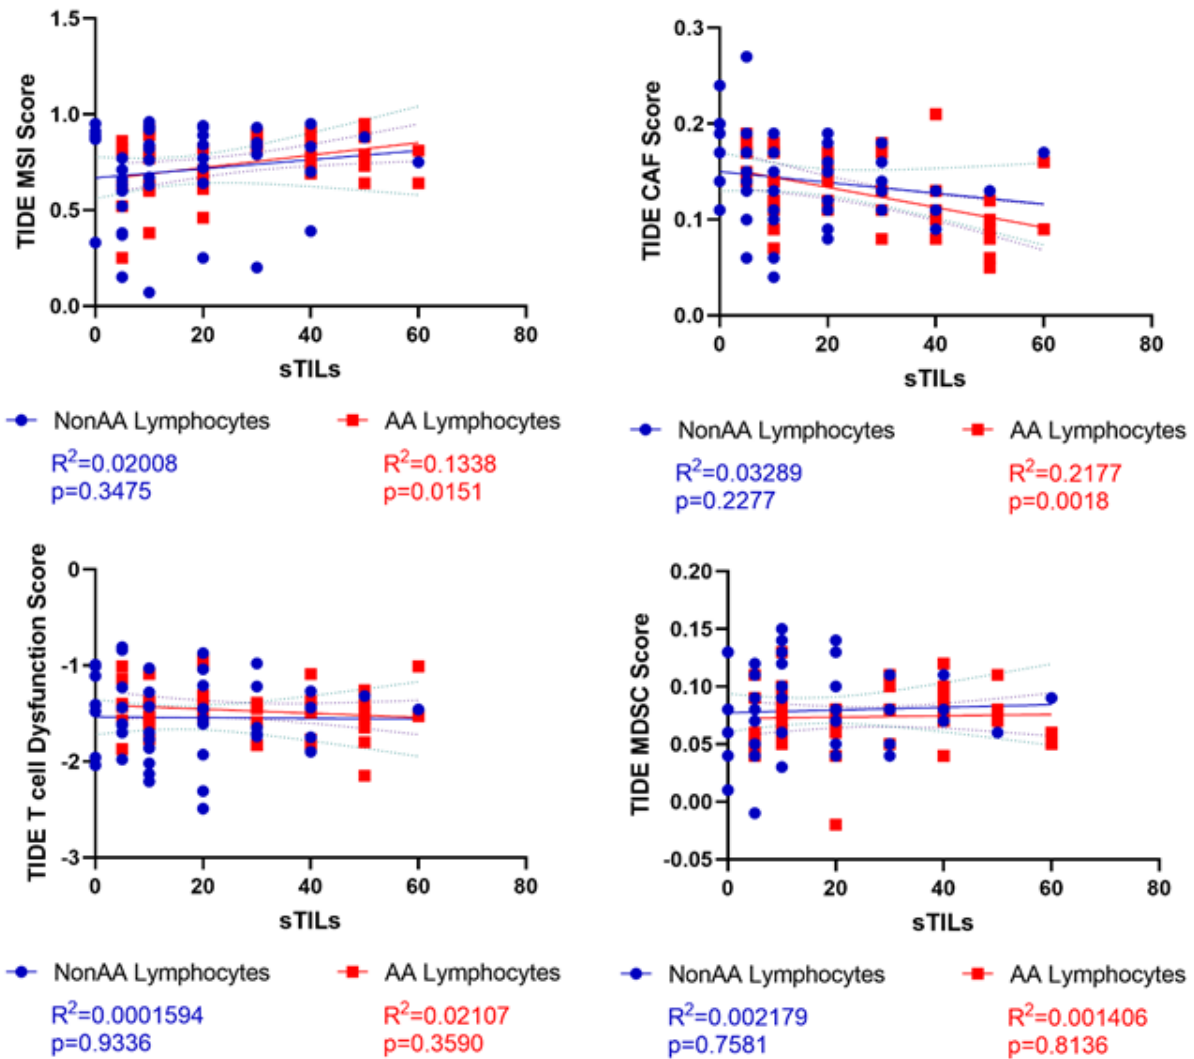

**Supplementary Figure 12. Correlations between histological stromal TILs and TIDE signature scores in TNBC in Non-African American (NonAA) and African American (AA) patients.** Blue = NonAA. Red = AA. P-values from Linear Regression.

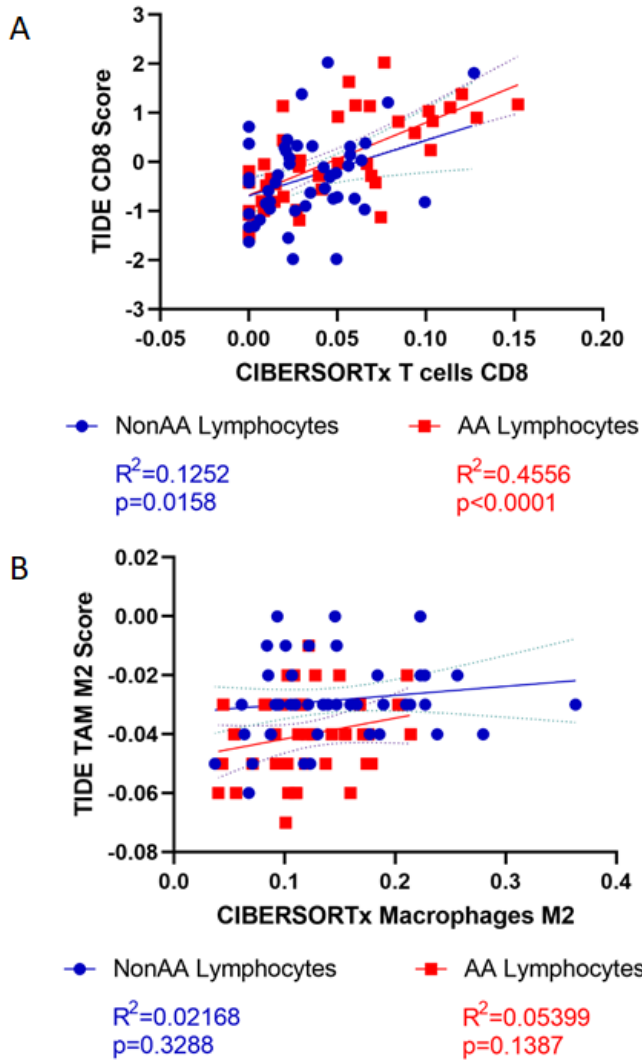

**Supplementary Figure 13. Correlations between similar populations deconvoluted with CIBERSORTx or TIDE signature scores in TNBC in Non-African American (NonAA) and African American (AA) patients. (A) CD8. (B) M2 Macrophages. Blue = NonAA. Red = AA. P-values from Linear Regression.**

## References

- 1 Park, J. H. *et al.* Prognostic value of tumor-infiltrating lymphocytes in patients with early-stage triple-negative breast cancers (TNBC) who did not receive adjuvant chemotherapy. *Annals of oncology : official journal of the European Society for Medical Oncology / ESMO* **30**, 1941-1949, doi:10.1093/annonc/mdz395 (2019).
